# Supplementary material for: Monte Carlo simulation of temperature-induced reversible morphological changes between sphere and vesicle formed by AB diblock copolymers
Source: Royal Society of Chemistry journal article supplement (doi:10.1039/c4ra04112g), 2014-09-30
Supplement: c4ra04112g1.pdf [file c4ra04112g1.pdf]

## Supplementary Information

### Monte Carlo simulation of temperature-induced reversible morphological changes between sphere and vesicle formed by AB diblock copolymers

Juanjuan Fan<sup>a,b</sup>, Jie Cui<sup>\*a</sup>, Yuanyuan Han<sup>\*a</sup>, Wei Jiang<sup>a</sup>

<sup>a</sup>State Key Laboratory of Polymer Physics and Chemistry, Changchun Institute of Applied Chemistry, Chinese Academy of Sciences, Changchun 130022, P. R. China;

<sup>b</sup>College of Information Technology, Jilin Agricultural University, Changchun, 130118, China.

#### Table of contents:

**S1.** The simulation results obtained in larger simulation box,  $L=50$ .

**S2.** The repeated simulation results with different initial states.

---

\*Corresponding author. yyhan@ciac.ac.cn. Telephone: +86-431-85262642. Fax: +86-431-85262126; jcui@ciac.ac.cn. Telephone: +86-431-85262642. Fax: +86-431-85262126.

**S1: The simulation results obtained in larger simulation box,  $L=50$ .**

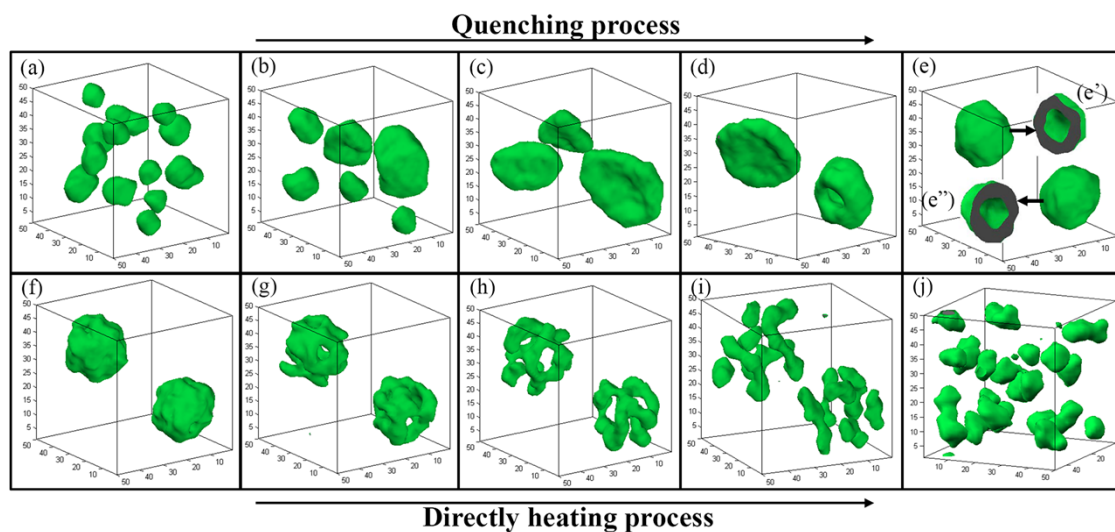

Figure S1. Snapshots at different stages showing the pathway of morphological change between sphere and vesicle under rapid temperature change rate (a)-(e) quenching process; (f)-(j) directly heating process. (a)  $1.0 \times 10^5$  MCS, (b)  $8.0 \times 10^5$  MCS, (c)  $2.5 \times 10^6$  MCS, (d)  $3.7 \times 10^6$  MCS, (e)  $4.8 \times 10^6$  MCS, (f) 250 MCS, (g) 1000 MCS, (h) 3000 MCS, (i)  $2.5 \times 10^4$  MCS, (j)  $4.0 \times 10^5$  MCS. For clarity, the cross sections of the vesicles are given in (e') and (e'').

**S2: The repeated simulation results with different initial states.**

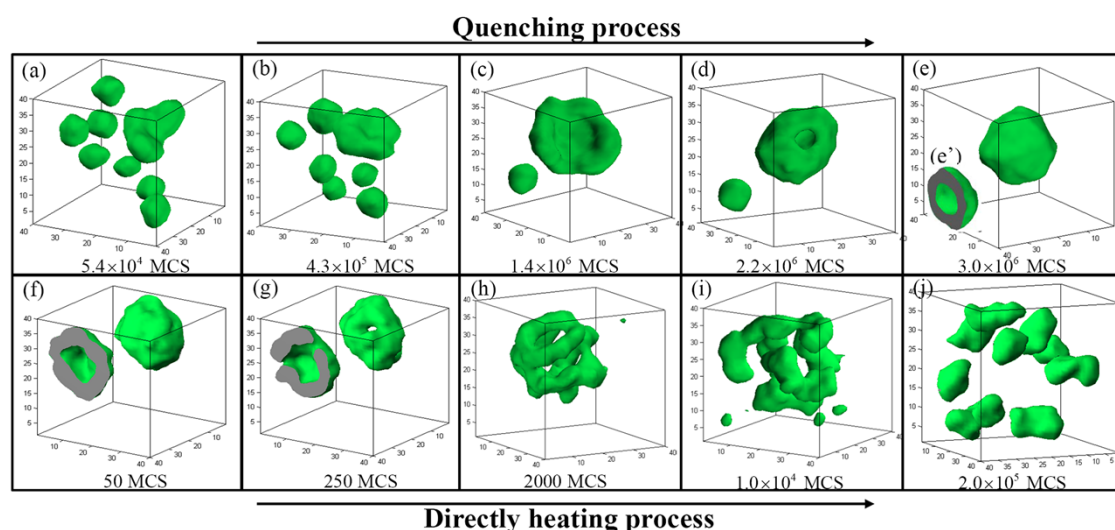

Figure S2. The pathways of morphological transition evolving from initial state 2 under rapid temperature change rate. (a)-(e) quenching process; (f)-(j) directly heating process. For clarity, the cross sections of the micelles are given in (e)', (f), (g).

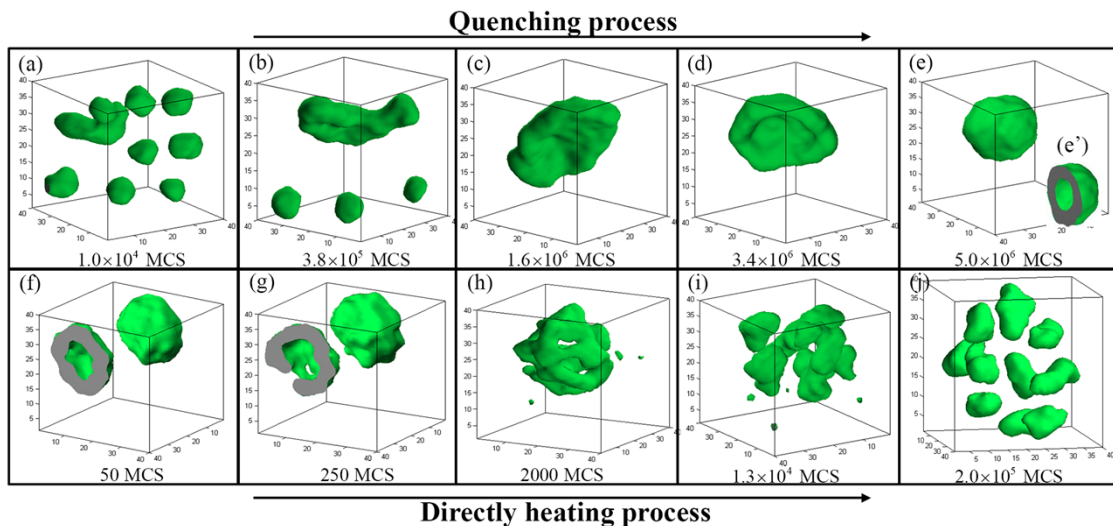

Figure S3. The pathways of morphological transition evolving from initial state 3 under rapid temperature change rate. (a)-(e) quenching process; (f)-(j) directly heating process. For clarity, the cross sections of the micelles are given in (e)', (f), (g).

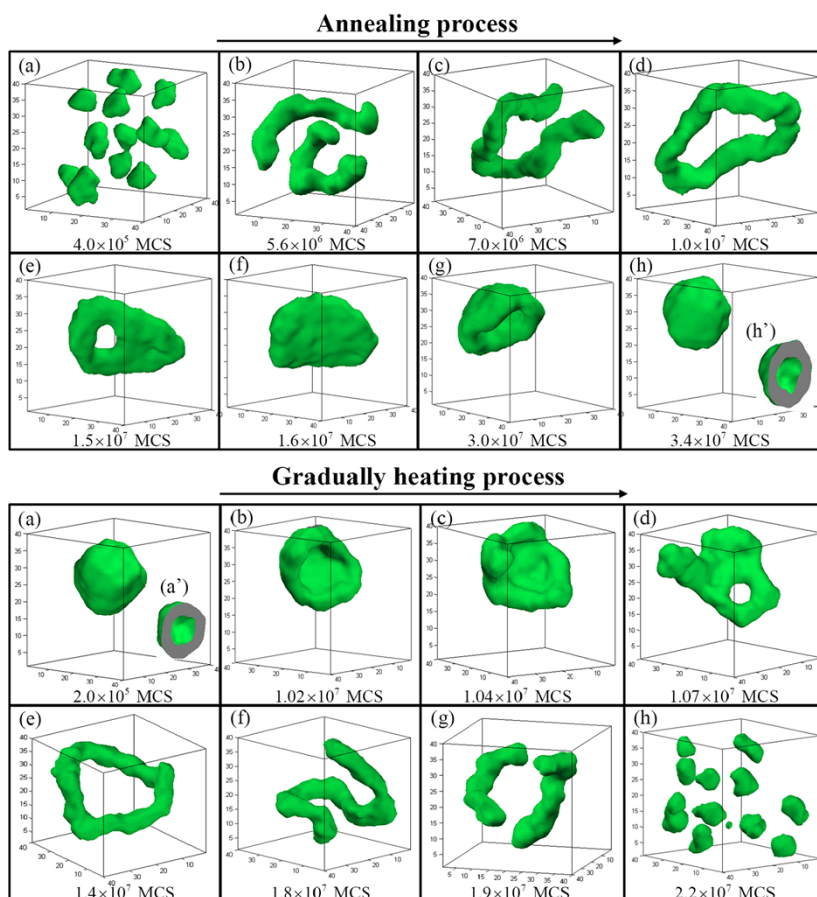

Figure S4. The pathways of morphological transition evolving from initial state 2 under slow temperature change rate. (a') and (h') are the cross sections of the corresponding vesicles.

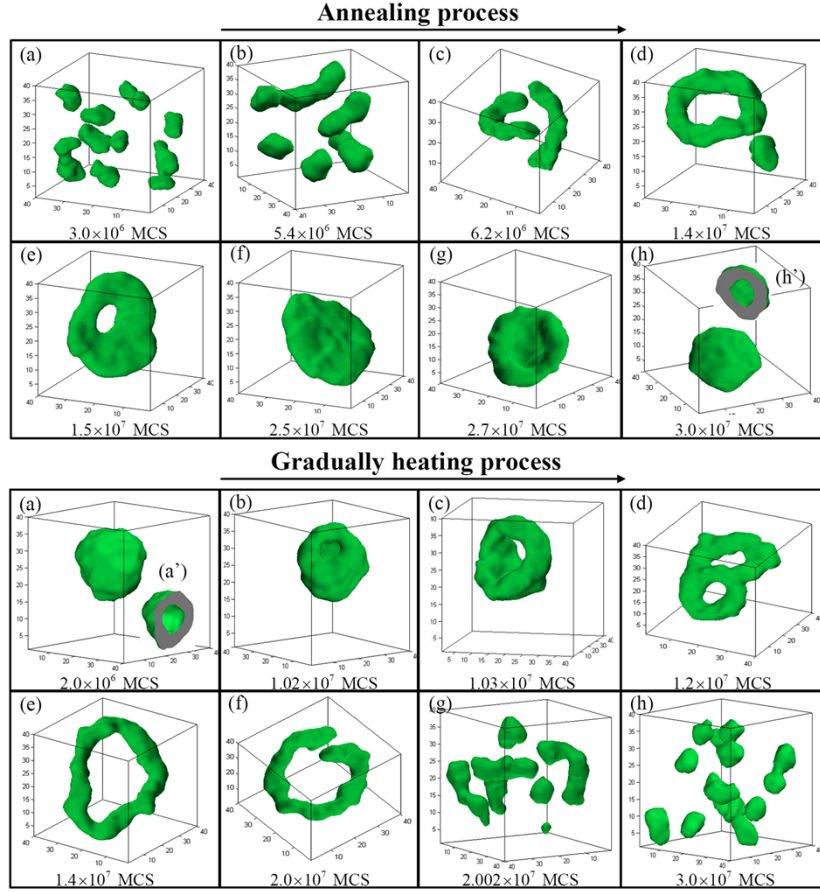

Figure S5. The pathways of morphological transition evolving from initial state 3 under slow temperature change rate. (a') and (h') are the cross sections of the corresponding vesicles.
